# Supplementary material for: Gold nanoparticles that target degraded elastin improve imaging and rupture prediction in an AngII mediated mouse model of abdominal aortic aneurysm
Source: PubMed Central journal article supplement — Theranostics. 2019 May 31;9(14):4156–67. doi: 10.7150/thno.34441 (PMC6592177; doi:10.7150/thno.34441), 2019-05-31
Supplement: thnov09p4156s1.pdf [file thnov09p4156s1.pdf]

## SUPPLEMENTAL MATERIAL

### Supplemental tables

Table S1. Diameter changes and dilation percentages of suprarenal abdominal aortas of AngII group mice

| Sample | Healthy(mm) | Aneurysmal(mm) | Diameter Measurements |               |
|--------|-------------|----------------|-----------------------|---------------|
|        |             |                | Dilation Percentages  | Fold Increase |
| MS#1   | 1.18±0.01   | 2.27±0.04      | 92.67%                | 1.93          |
| MS#2   | 1.12±0.02   | 2.31±0.04      | 106.62%               | 2.07          |
| MS#3   | 1.03±0.05   | 2.35±0.01      | 127.97%               | 2.28          |
| MS#4   | 1.30±0.05   | 2.83±0.08      | 117.64%               | 2.18          |
| MS#5   | 1.17±0.01   | 2.25±0.01      | 92.20%                | 1.92          |
| MS#6   | 0.93±0.04   | 1.55±0.04      | 66.39%                | 1.66          |
| MS#7   | 0.88±0.06   | 2.15±0.08      | 144.83%               | 2.45          |
| MS#8   | 1.03±0.07   | 1.84±0.10      | 79.15%                | 1.79          |
| MS#9   | 1.02±0.05   | 1.40±0.08      | 38.23%                | 1.38          |
| MS#10  | 1.23±0.02   | 1.39±0.06      | 12.18%                | 1.12          |
| MS#11  | 1.30±0.03   | 2.51±0.03      | 92.45%                | 1.92          |

## Supplemental figures and figure legends

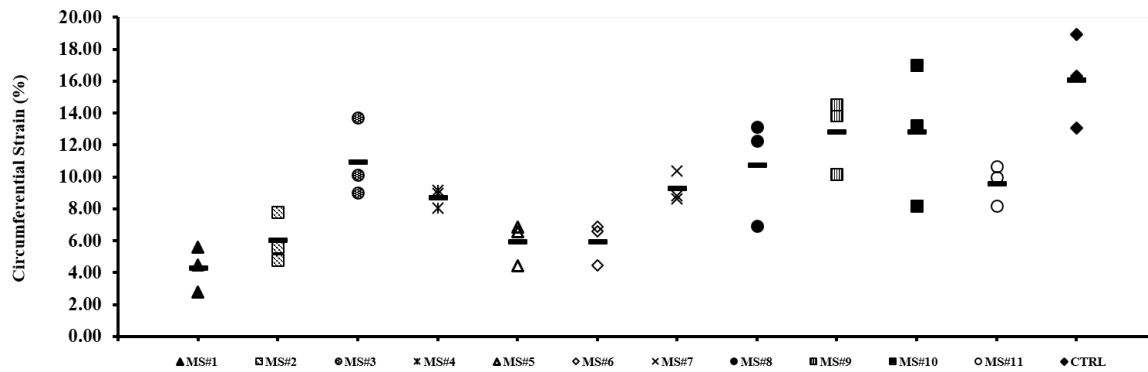

**Figure S1. Circumferential strains for all samples**

Circumferential Green-LaGrange strains throughout the cardiac cycle. All aneurysmal aortas showed a reduction in the strain values when compared to a healthy control. Measurements were obtained from three different cardiac cycles represented by the data points in the graph. Solid line in each group represents the mean value.

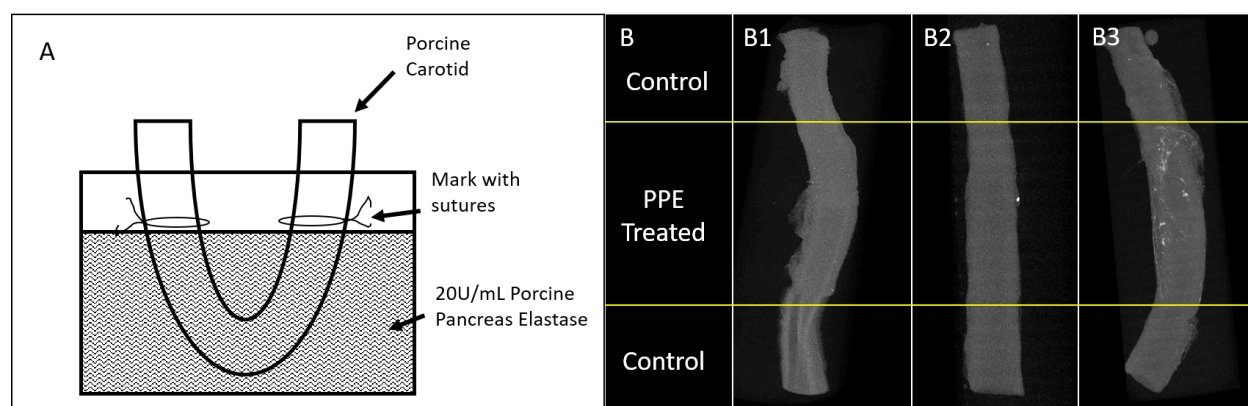

**Figure S2. In vitro study to optimize the imaging property of gold nanoparticles**

**A.** Schematic representation of the *in vitro* study that was used to test the targeting properties of degraded elastase targeting antibody conjugated gold nanoparticles (EL-GNPs). The middle part of each porcine carotid segment was immersed in 20U/mL porcine pancreas elastase (PPE, Tris buffered, pH= 7.8) for 90mins. After the PPE treatment, entire segments were immersed in 2mL of 3mg/mL different EL-GNPs overnight. Samples were washed three times in PBS for 5 mins per wash before being scanned with micro-CT in corn oil. **B.** Signals for differently conjugated EL-GNPs in the reconstructed porcine carotid MIP models. **B1.** Porcine carotid with GNPs that were incubated with PEG at a ratio of 4:1 for 4 hrs at room temperature, reacted with sulfo-NHS and EDC for 2hrs at room temperature and incubated with elastase antibody at 4°C overnight; **B2.** Porcine carotid with GNPs were incubated with PEG at a ratio of 2:5 for 8 hrs at room temperature, reacted with sulfo-NHS and EDC for 4hrs at room temperature and incubated with elastase antibody at 4°C overnight; **B3.** Porcine carotid with GNPs were incubated with PEG at a ratio of 1:4 for 48 hrs at 4°C, reacted with sulfo-NHS and EDC for 6hrs at room temperature and incubated with elastase antibody at 4°C overnight. B3 showed more EL-GNP accumulation which resulted in a much stronger signal, therefore, this conjugating method was used in the later experiments.

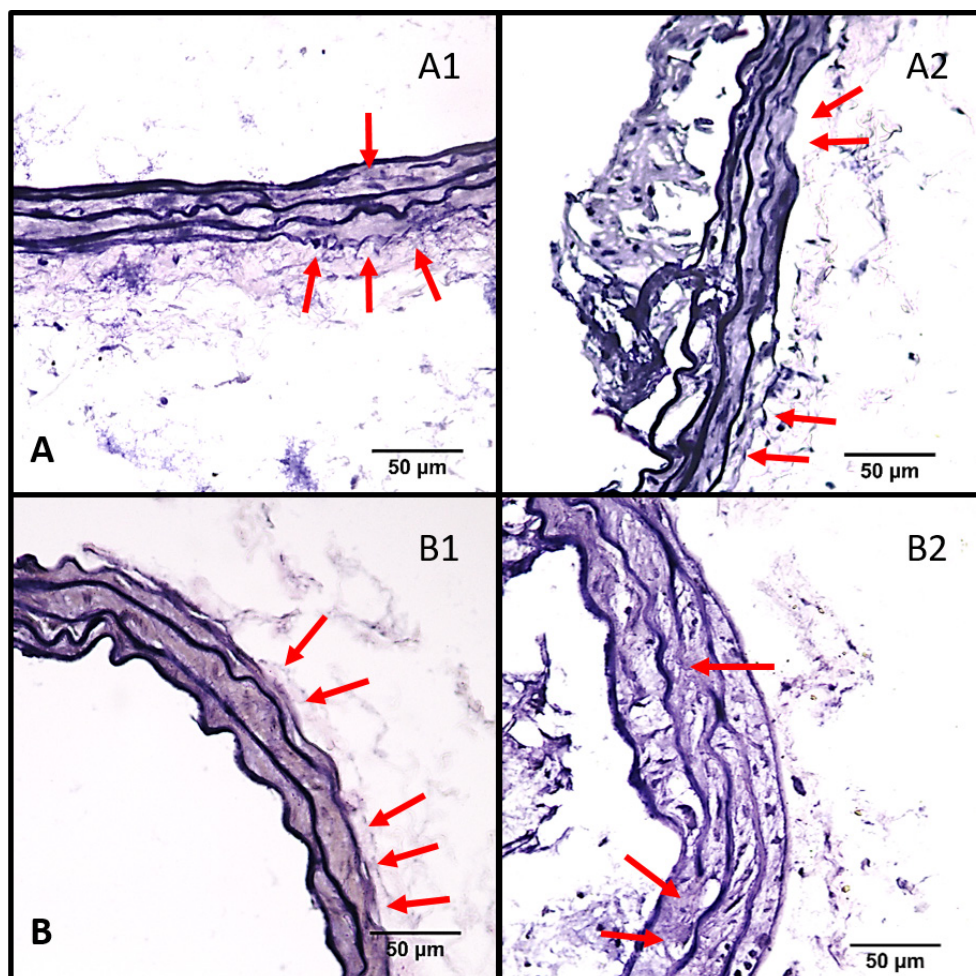

**Figure S3. Elastin damage in aortic walls for MS#9 and MS#10**

**A.** Verhoeff van Gieson staining for MS#9 and **B.** for MS#10. Both samples did not meet the 1.5-fold threshold but still presented with elastin damage, indicated by the red arrows.
